# Supplementary material for: Prebiotic effects of pectooligosaccharides obtained from lemon peel on the microbiota from elderly donors using an in vitro continuous colon model (TIM-2)
Source: Royal Society of Chemistry journal article supplement (doi:10.1039/d0fo01848a), 2020-01-01

**FIGURE S1.** Normalised OTUs abundances of additional microbiota features (rank 7-15) from the OTUs identified according to Random Forest analysis for the different carbohydrate experiments (average of t24-t72h). FOS, fructooligosaccharides; POS, pectooligosaccharides; SIEM, standard ileal efflux medium.

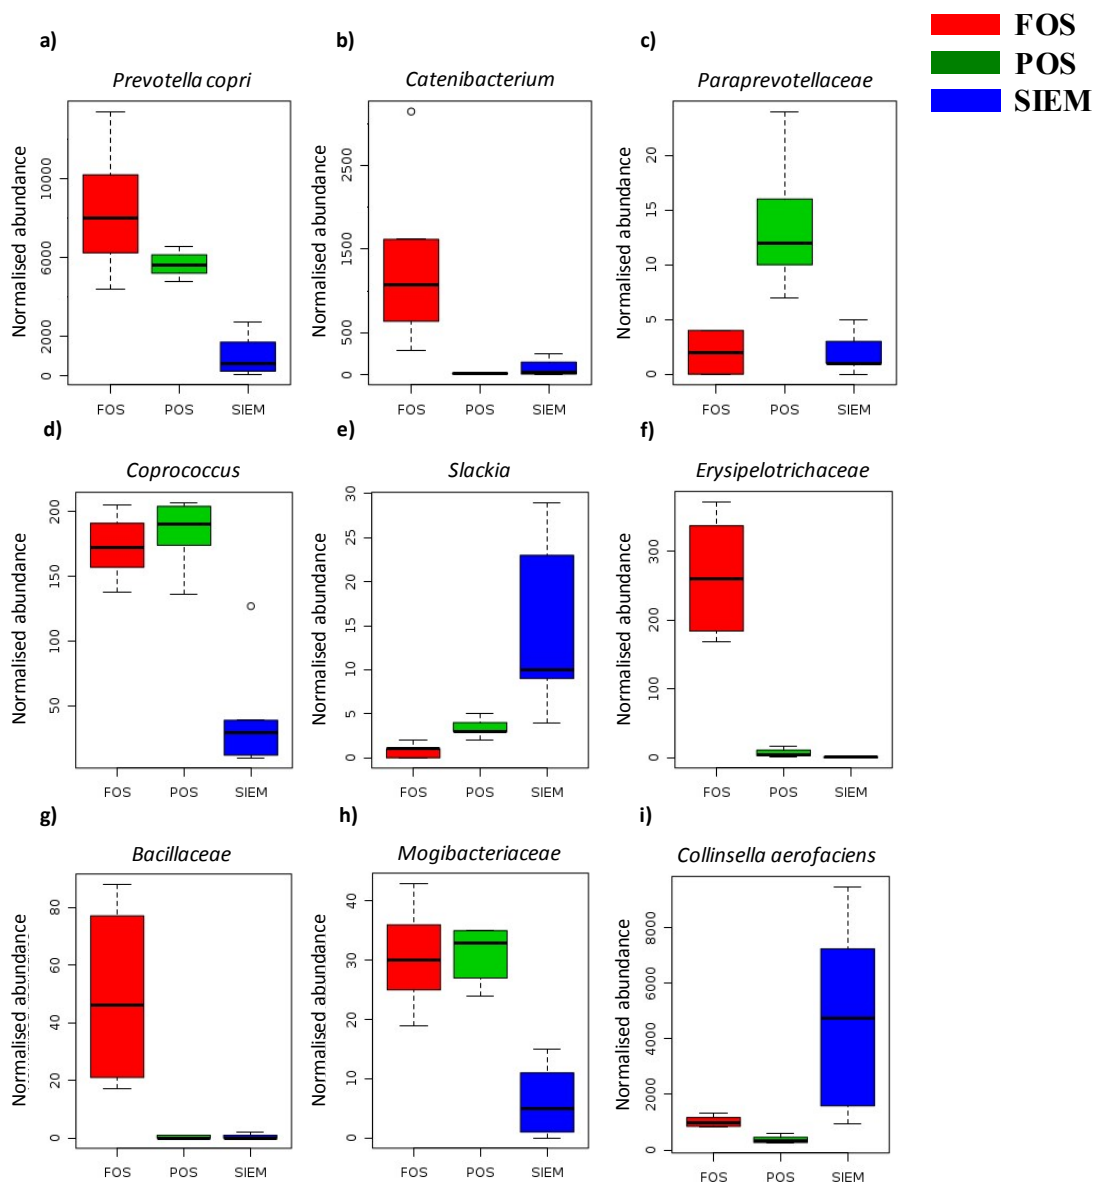

**FIGURE S2.** Rarefaction curves of microbial community richness and diversity at t 24, 48 and 72 h in POS experiments. (a) Phylogenetic diversity of Whole Tree (PD<sub>whole tree</sub>) and 72 h in POS experiments. (b) number of observed OTUs, (c) Chao1 index and (d) Shannon index are shown. Different letters indicate the existence of significant differences among sampling times at 21400 seqs/sample (Tukey's test  $p < 0.05$ ). OTUs, operational taxonomic units, POS, pectooligosaccharide mixture.

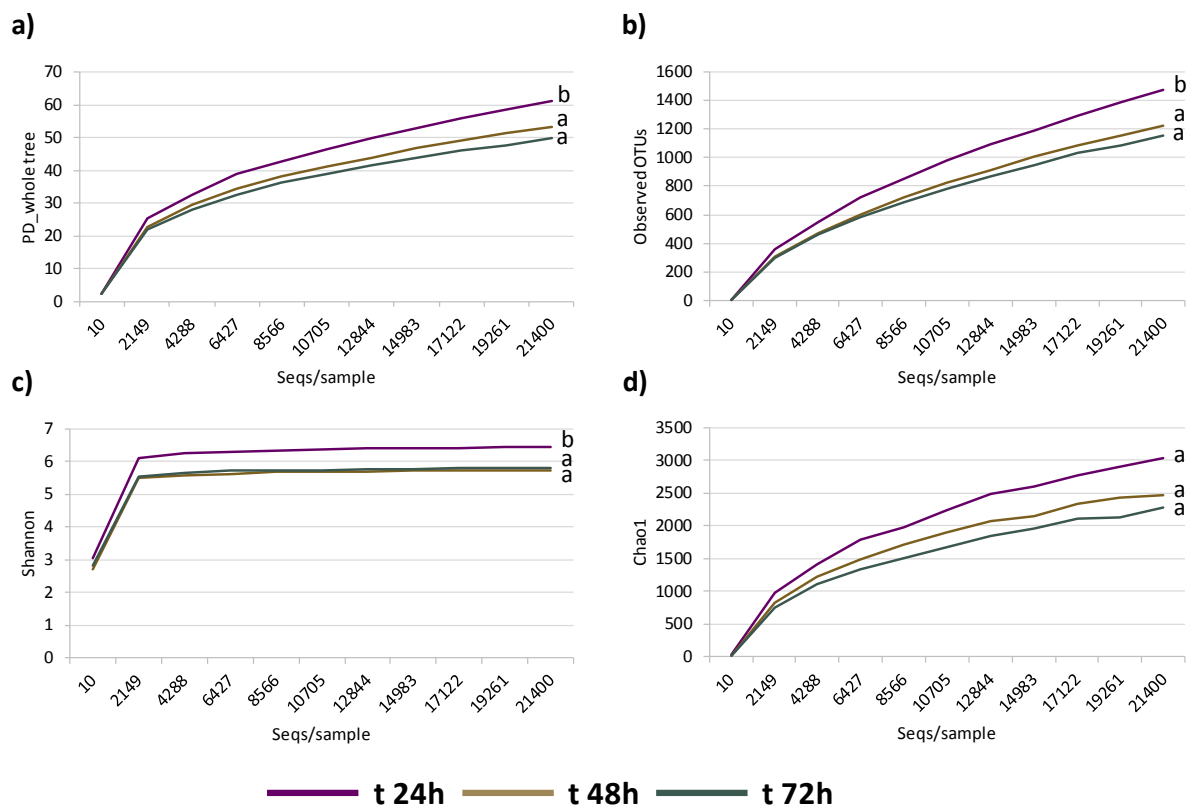

**FIGURE S3.** Rarefaction curves of microbial community richness and diversity at t 24, 48 and 72 h in FOS experiments. (a) Phylogenetic diversity of Whole Tree (PD<sub>whole tree</sub>) and 72 h in FOS experiments. (b) number of observed OTUs, (c) Chao1 index and (d) Shannon index are shown. Different letters indicate the existence of significant differences among sampling times at 21400 seqs/sample (Tukey's test  $p < 0.05$ ). OTUs, operational taxonomic units, FOS, fructooligosaccharides.

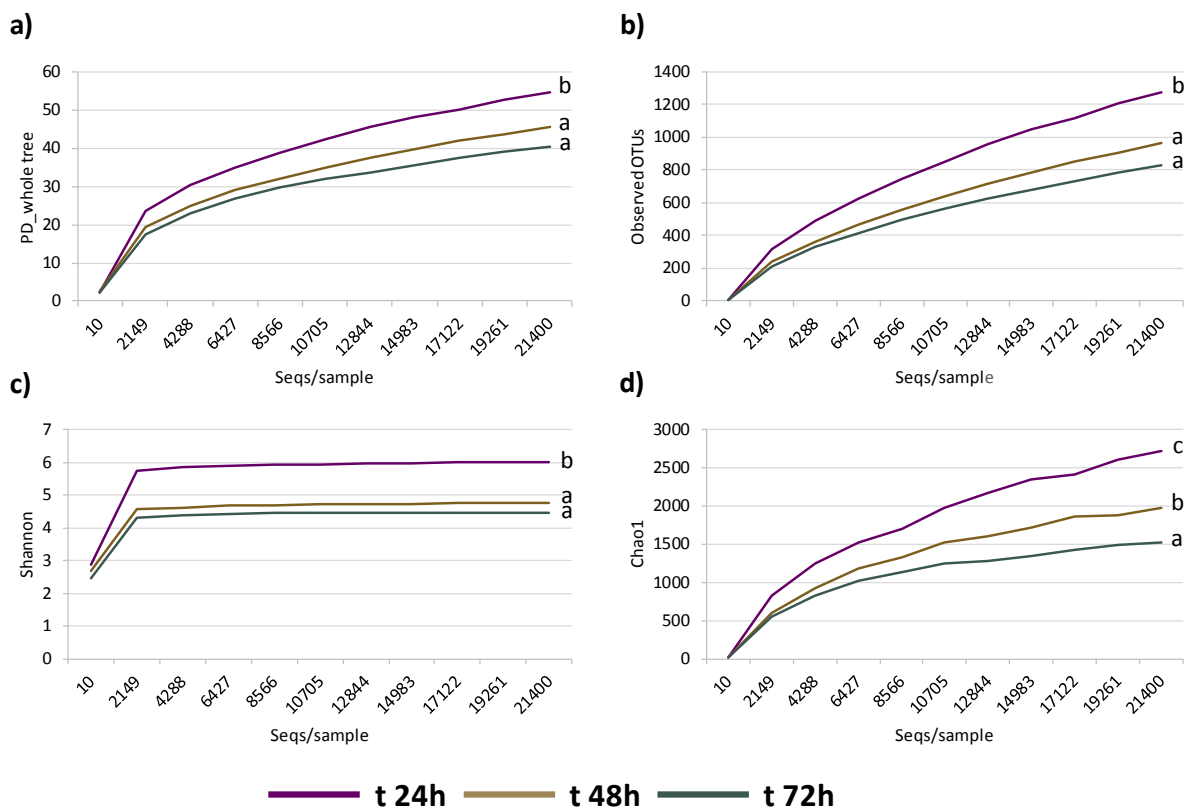

**FIGURE S4.** Rarefaction curves of microbial community richness and diversity at t 24, 48 and 72h in SIEM experiments. (a) Phylogenetic diversity of Whole Tree (PD<sub>whole tree</sub>) and 72h in SIEM experiments. (a) Phylogenetic diversity of Whole Tree (PD<sub>whole tree</sub>) (b) number of observed OTUs, (c) Chao1 index and (d) Shannon index are shown. Different letters indicate the existence of significant differences among sampling times at 21400 seqs/sample (Tukey's test  $p < 0.05$ ). OTUs, operational taxonomic units; SIEM, standard ileal efflux medium.

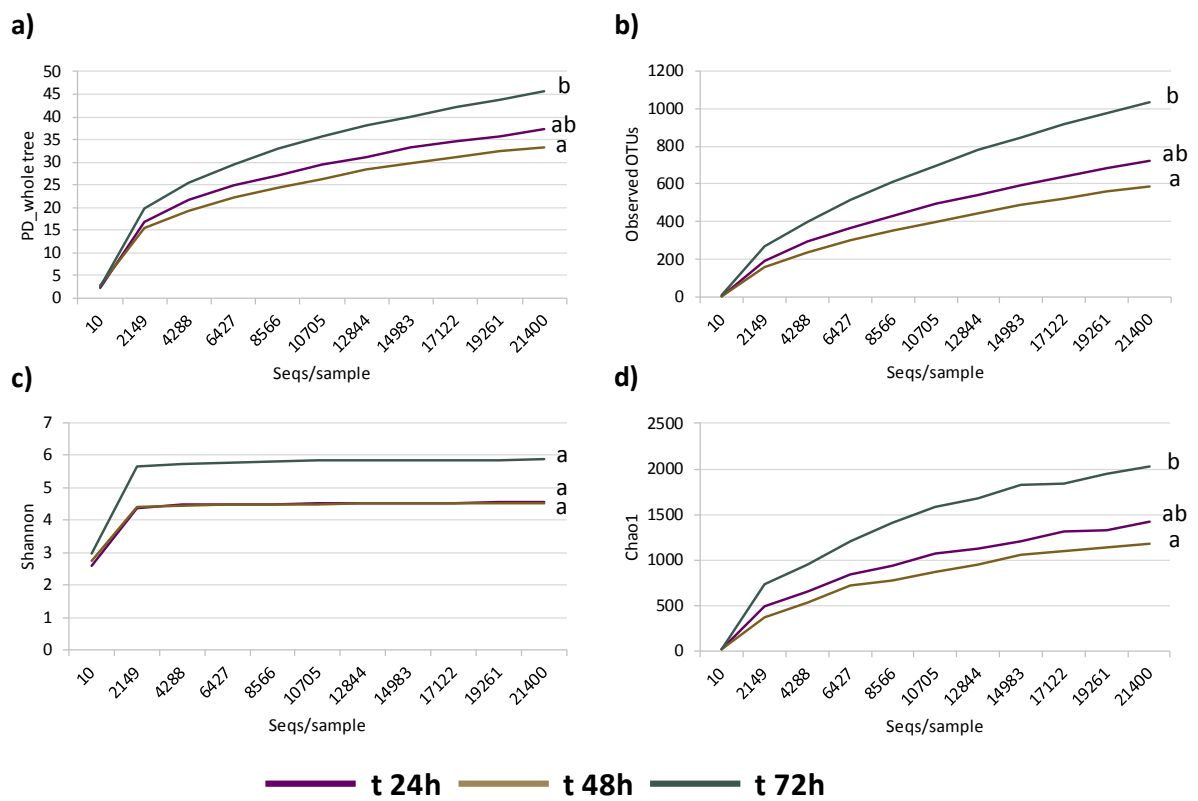

Supplement: d0fo01848a1.pdf [file d0fo01848a1.pdf]
